# Supplementary material
Source: PubMed Central journal article supplement (PMC2859703)

# Supplementary Figure 4

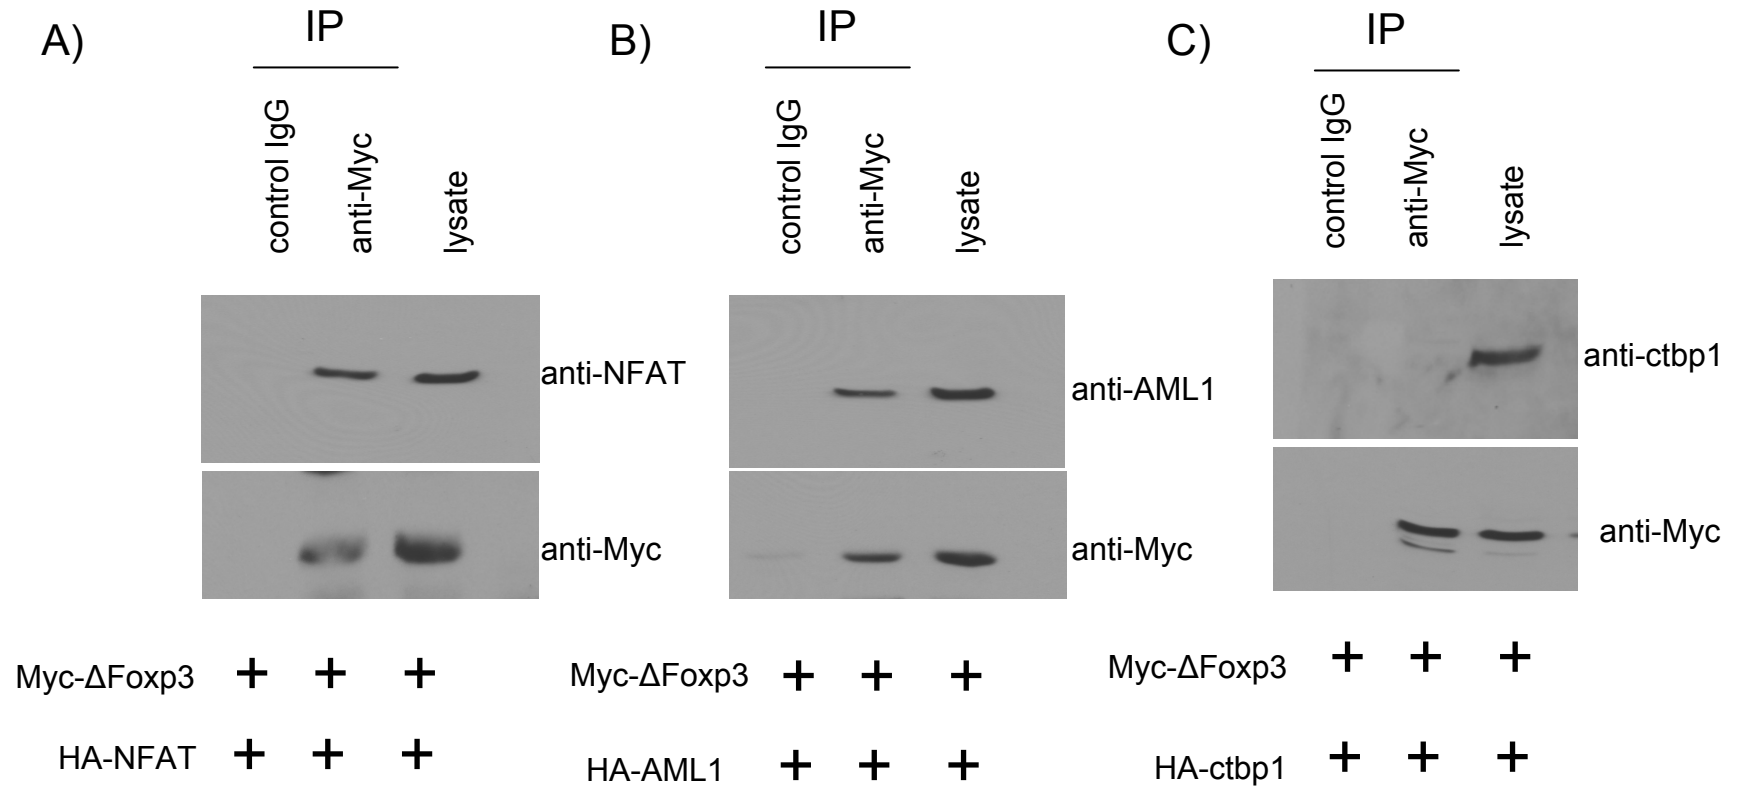

Supplement: NIHMS192035-supplement-10.pdf [file NIHMS192035-supplement-10.pdf]

## Supplementary Fig.S5

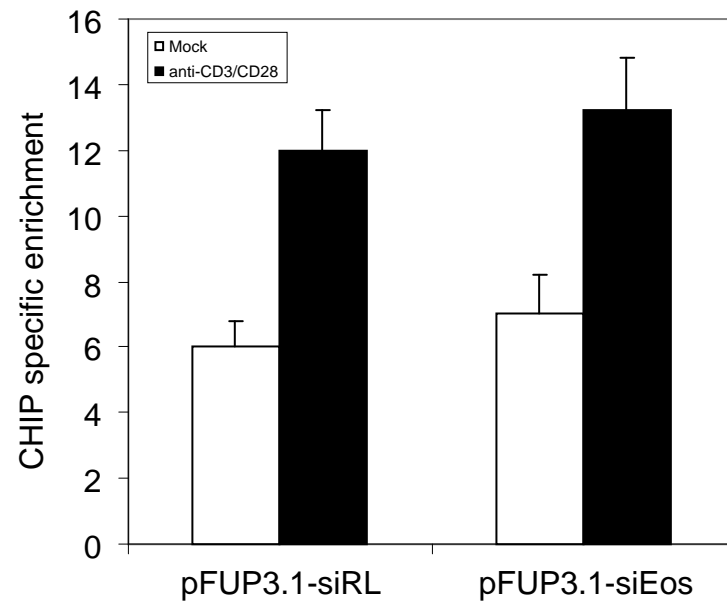

Supplement: NIHMS192035-supplement-11.pdf [file NIHMS192035-supplement-11.pdf]

## Supplementary Fig.S6

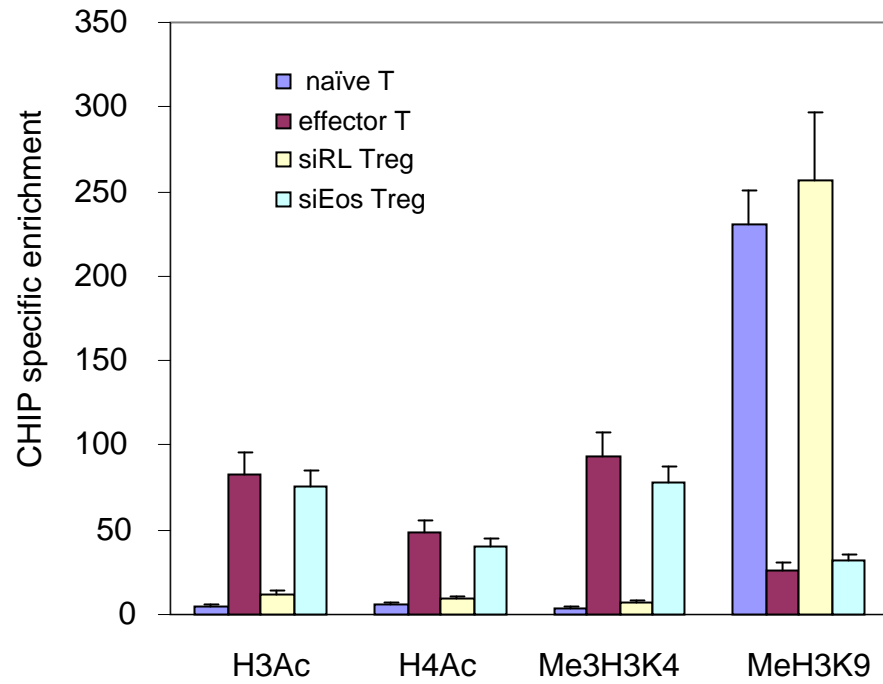

Supplement: NIHMS192035-supplement-12.pdf [file NIHMS192035-supplement-12.pdf]

## Supplementary Fig.S7

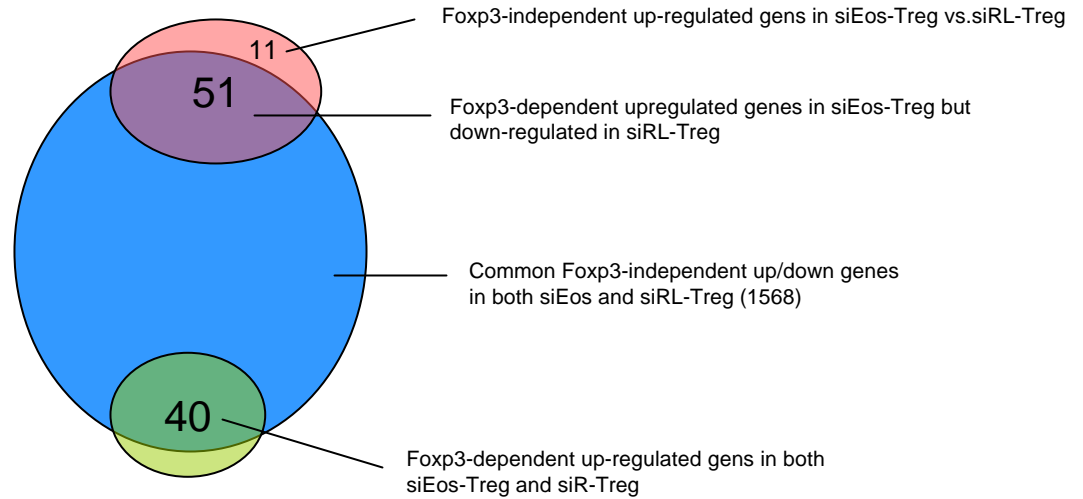

Supplement: NIHMS192035-supplement-13.pdf [file NIHMS192035-supplement-13.pdf]

**Supplementary Fig. S8**

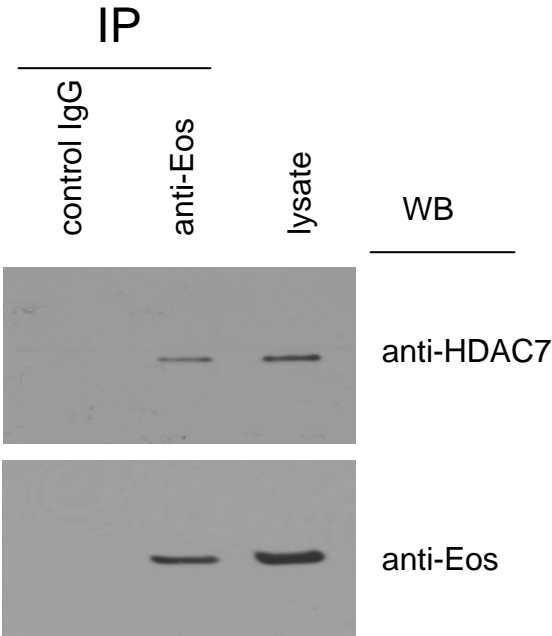

Supplement: NIHMS192035-supplement-14.pdf [file NIHMS192035-supplement-14.pdf]

# Supplementary Fig. S9

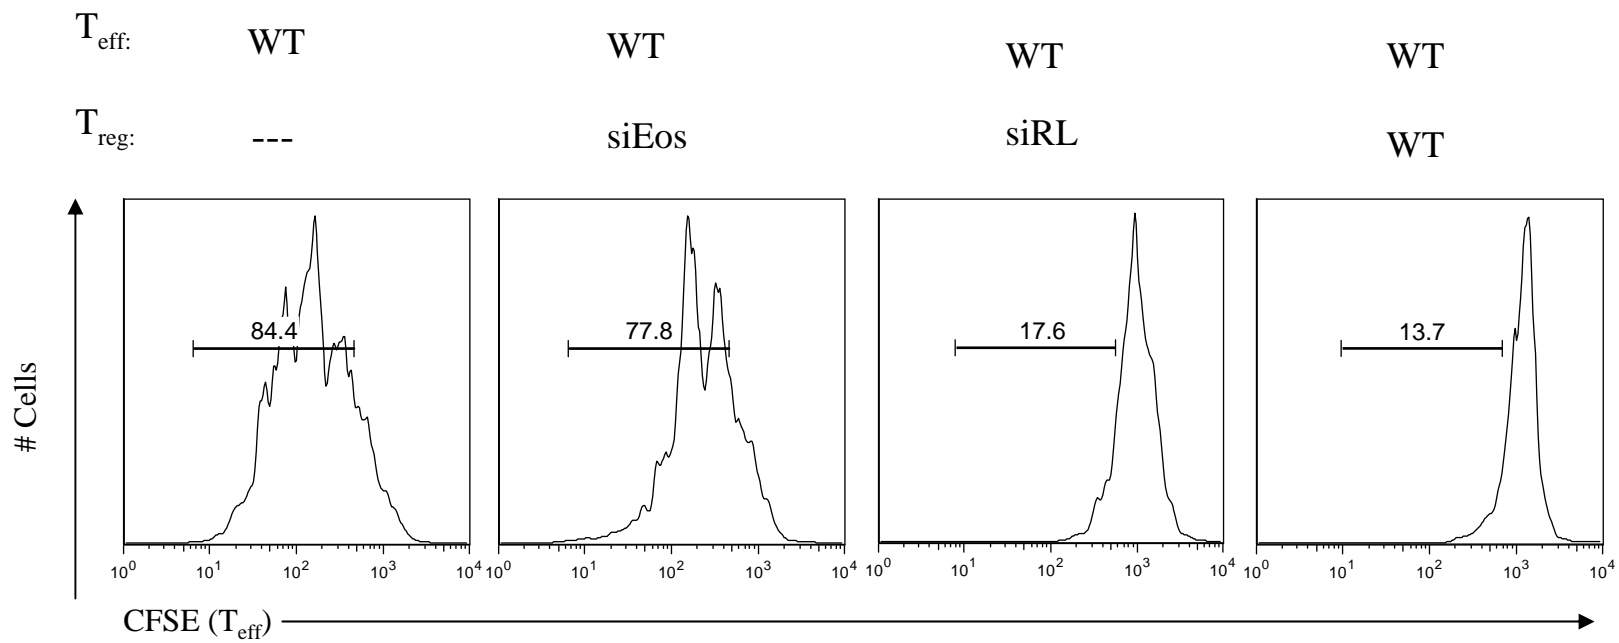

Supplement: NIHMS192035-supplement-15.pdf [file NIHMS192035-supplement-15.pdf]

Supplementary Fig. S10

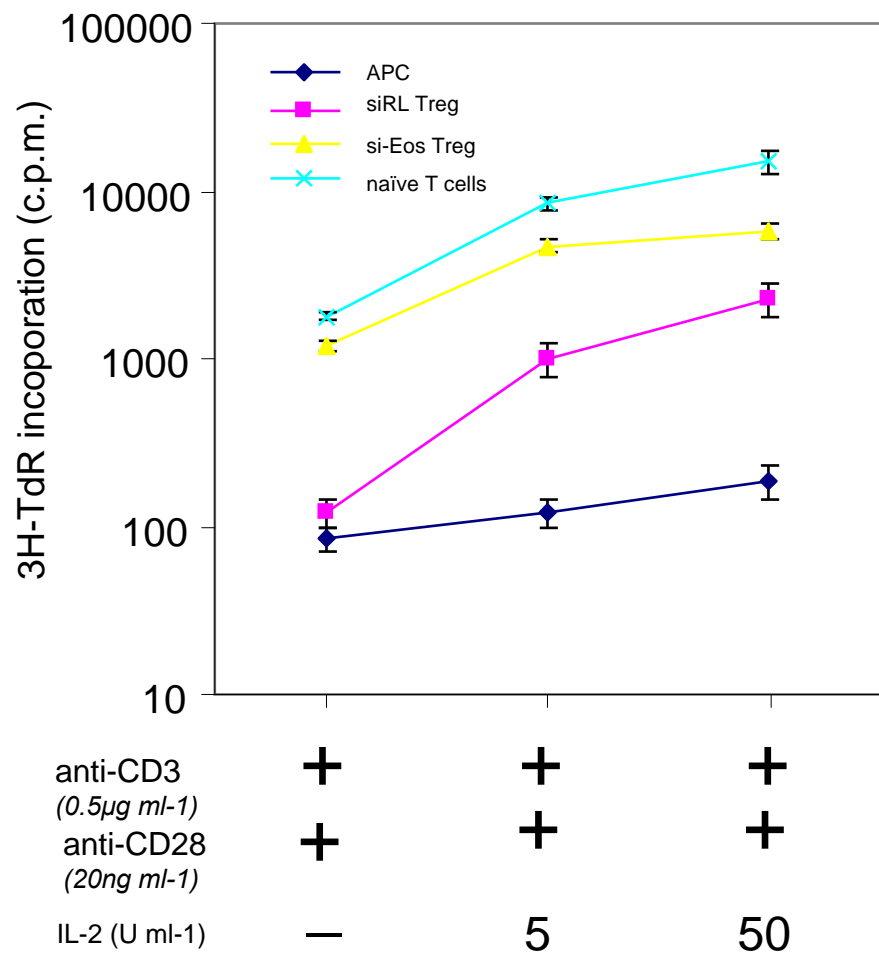

Supplement: NIHMS192035-supplement-16.pdf [file NIHMS192035-supplement-16.pdf]

## Supplementary Fig.S11

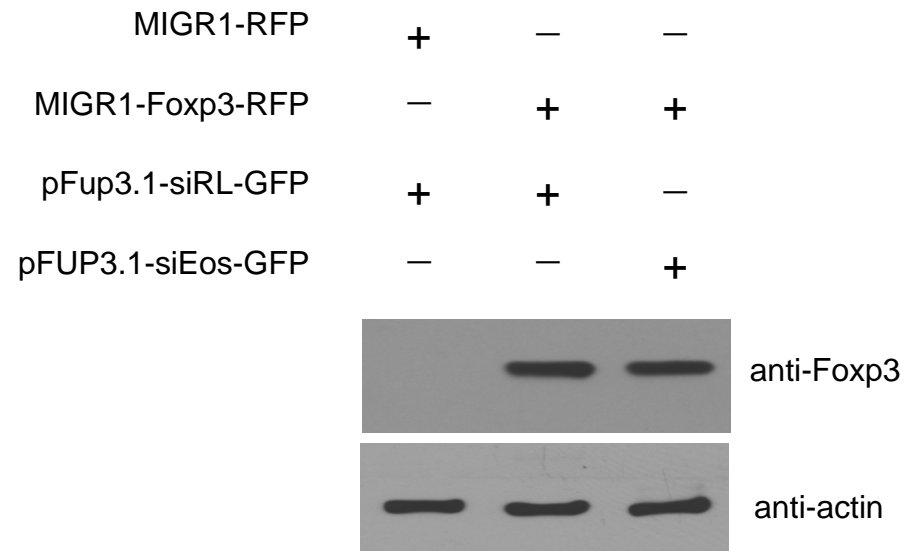

Supplement: NIHMS192035-supplement-17.pdf [file NIHMS192035-supplement-17.pdf]

**Supplementary Fig. S12**

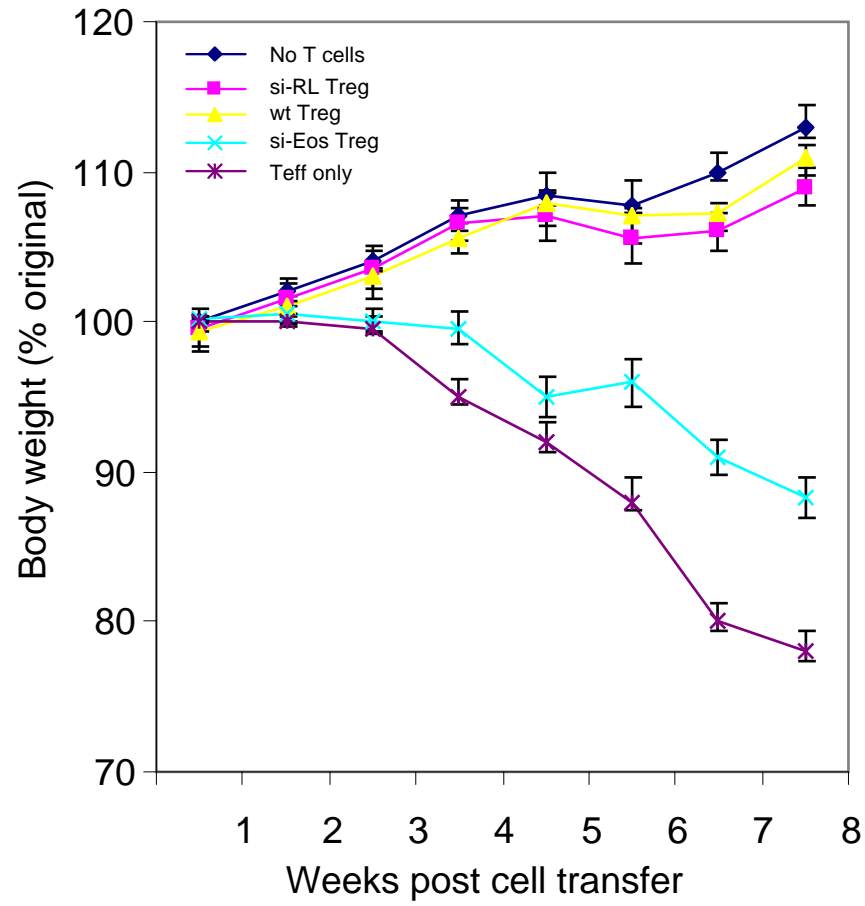

Supplement: NIHMS192035-supplement-18.pdf [file NIHMS192035-supplement-18.pdf]

# Supplementary Fig. S13

A)

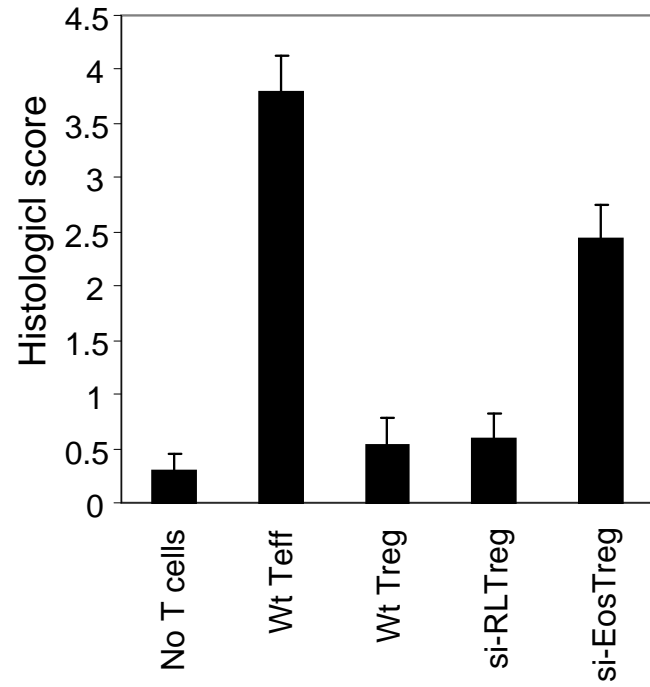

B)

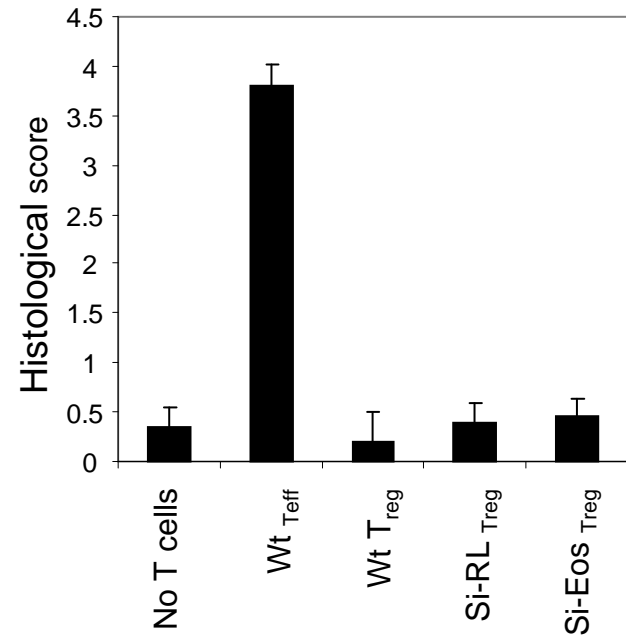

Supplement: NIHMS192035-supplement-19.pdf [file NIHMS192035-supplement-19.pdf]

# Supplementary Fig. S14

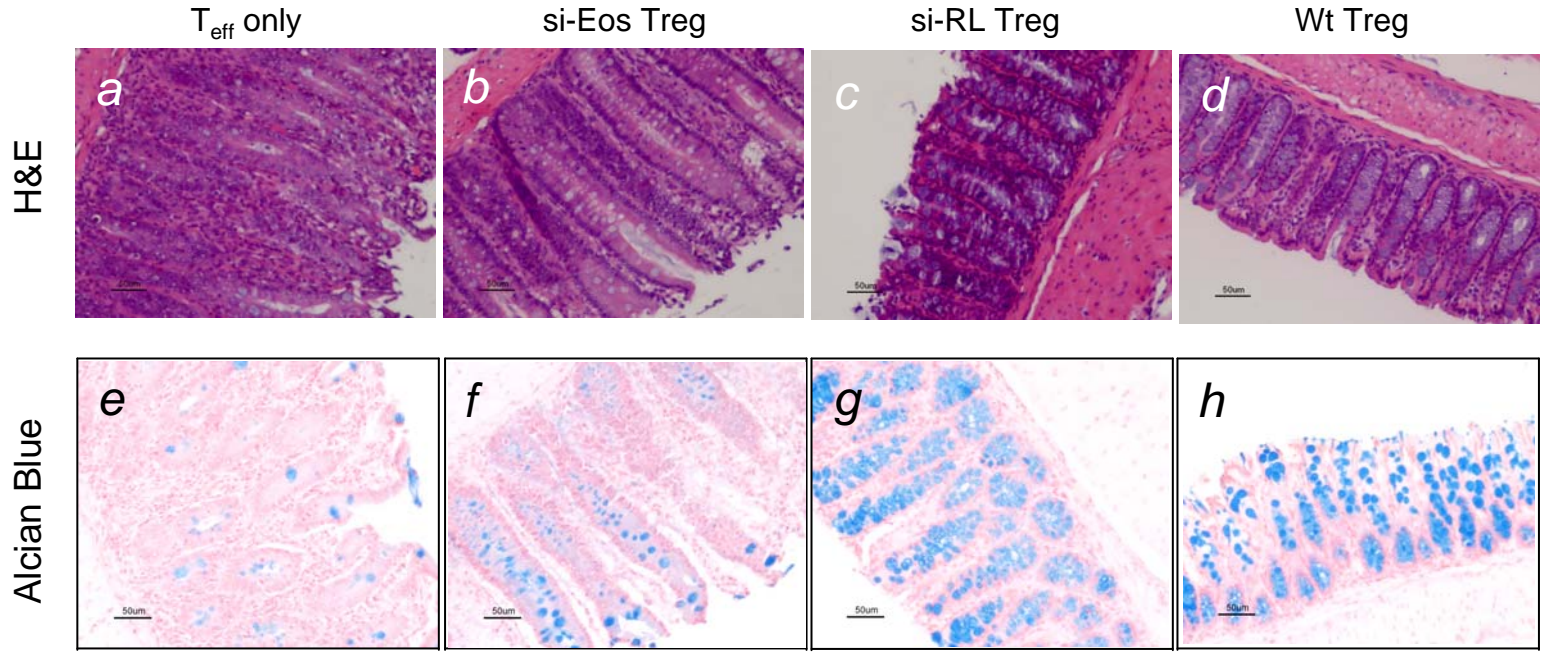

Supplement: NIHMS192035-supplement-20.pdf [file NIHMS192035-supplement-20.pdf]

# Supplementary Fig. S15

A)

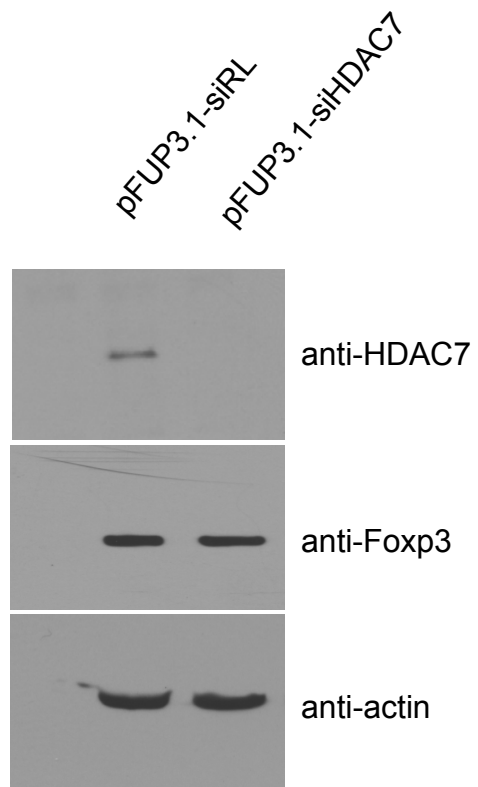

B)

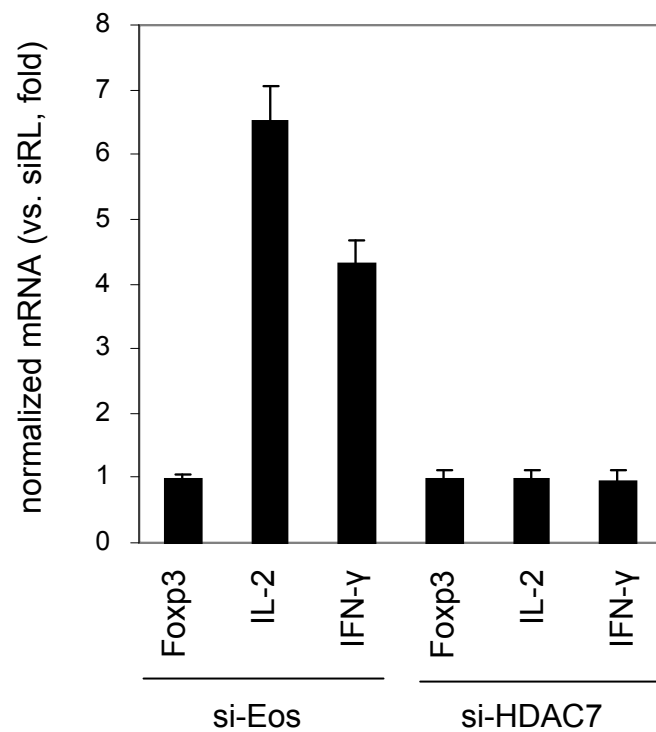

Supplement: NIHMS192035-supplement-21.pdf [file NIHMS192035-supplement-21.pdf]

## Supplementary Fig. S1

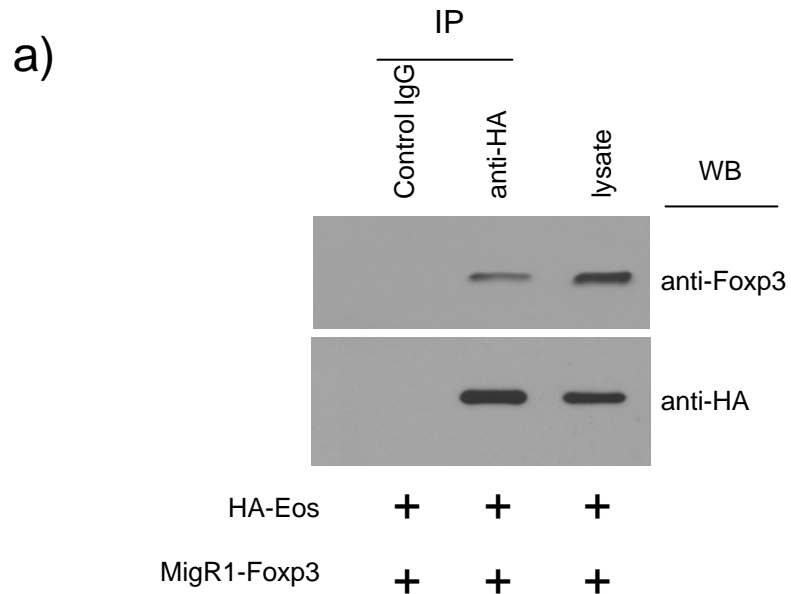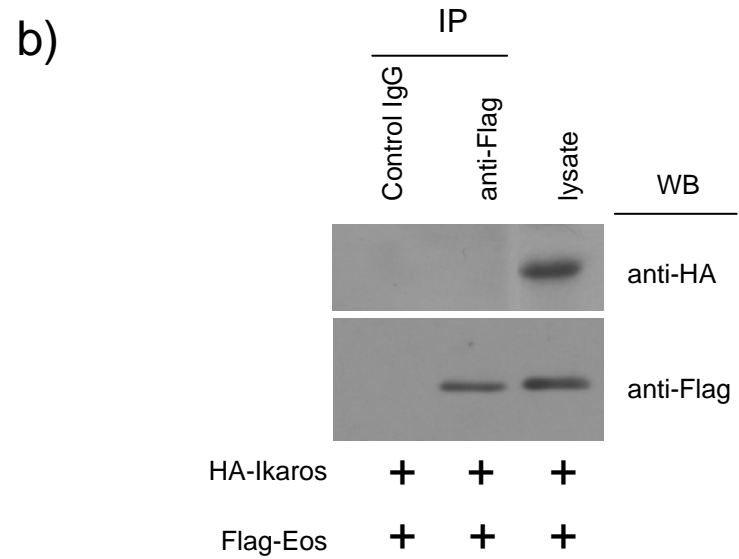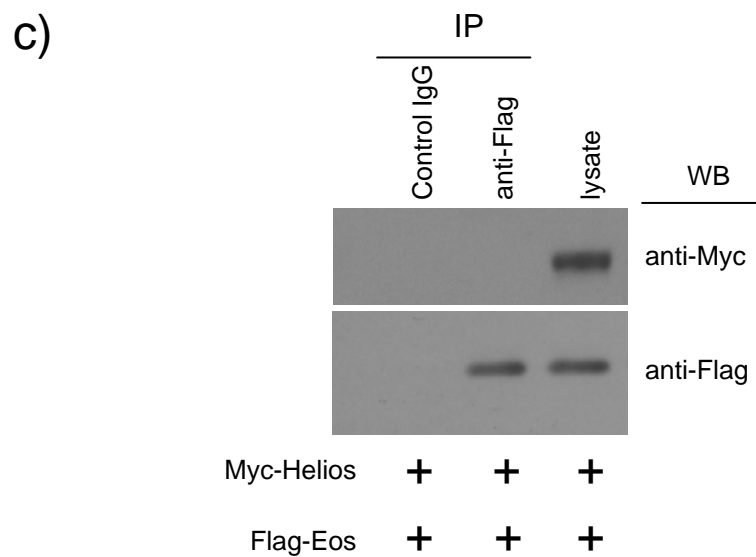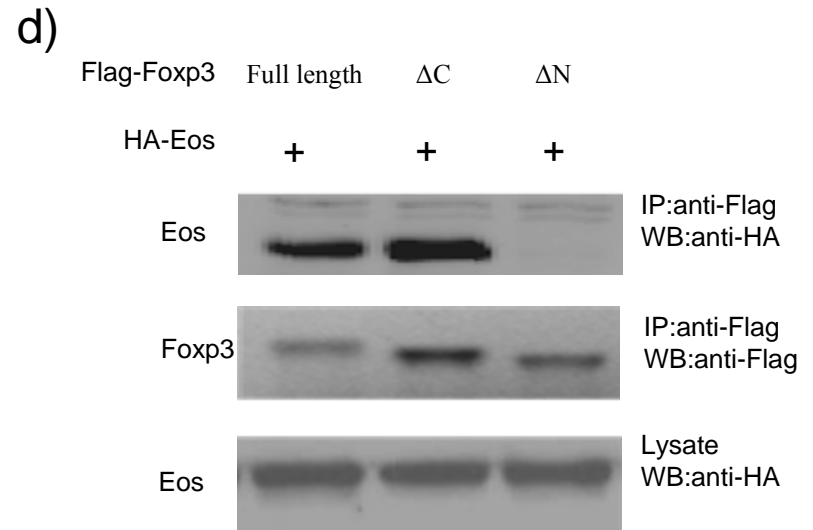

Supplement: NIHMS192035-supplement-7.pdf [file NIHMS192035-supplement-7.pdf]

## Supplementary Figure 2

A)

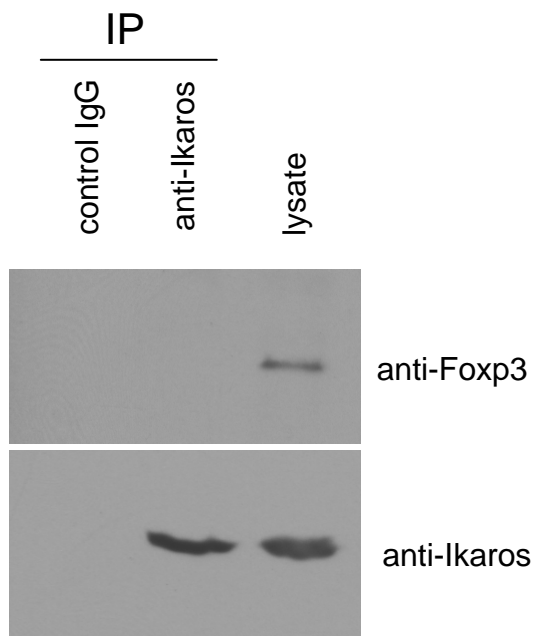

B)

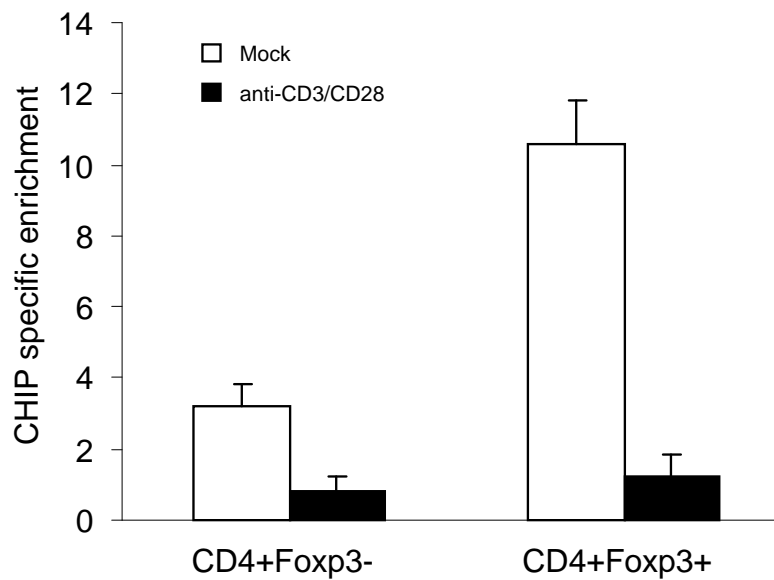

Supplement: NIHMS192035-supplement-8.pdf [file NIHMS192035-supplement-8.pdf]

# Supplementary Figure 3

|                 |   |   |    |    |
|-----------------|---|---|----|----|
| MiGR1-RFP       | - | + | -  | -  |
| MiGR1-Foxp3-RFP | - | - | 2x | 1x |
| CD3/CD28        | - | + | +  | +  |

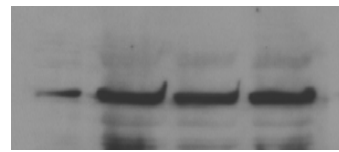

anti-Eos

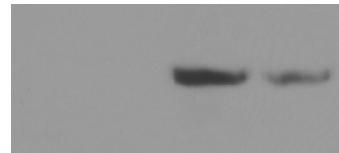

anti-Foxp3

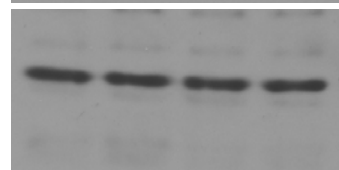

anti-actin

Supplement: NIHMS192035-supplement-9.pdf [file NIHMS192035-supplement-9.pdf]
